# Supplementary material for: Efficient removal of caesium ions from aqueous solution using a calix crown ether in ionic liquids: mechanism and radiation effect
Source: Royal Society of Chemistry journal article supplement (doi:10.1039/b925594j), 2010-01-01
Supplement: b925594j.pdf [file b925594j.pdf]

## Supplementary Information Figure Caption

**Fig. S1** Relations between  $D_{Cs}$  and the concentration of BPC6 in  $[C_n\text{mim}][\text{NTf}_2]$ .

**Fig. S2** Dependence of  $D_{Cs}$  on the initial  $\text{HNO}_3$  concentration in aqueous phase of BPC6/ $[C_n\text{mim}][\text{NTf}_2]$  systems.  $[\text{BPC6}]_{\text{initial}} = 15 \text{ mmol L}^{-1}$ ,  $[\text{Cs}^+]_{\text{initial}} = 10 \text{ mmol L}^{-1}$ .

**Fig. S3** Dependence of the absorbance of  $[\text{C}_4\text{mim}]^+$  at 211 nm in the aqueous phase on the concentration of extracted  $\text{Cs}^+$ .

**Fig. S4** Dependence of pH in aqueous solutions and  $E_{Cs}$  on  $\gamma$ -dose when  $\text{Cs}^+$  extraction from the aqueous solution using irradiated  $[\text{C}_4\text{mim}][\text{NTf}_2]$  in combination with BPC6.

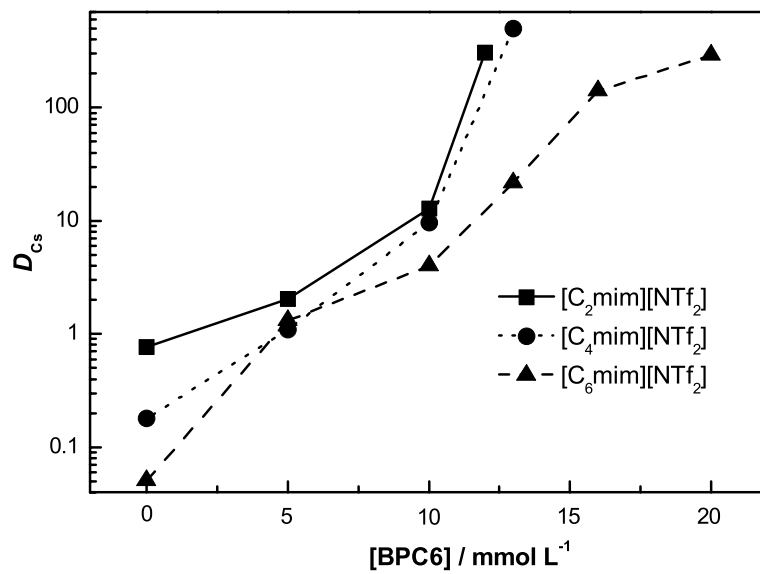

**Fig. S1** Relations between  $D_{Cs}$  and the concentration of BPC6 in [C<sub>n</sub>mim][NTf<sub>2</sub>].

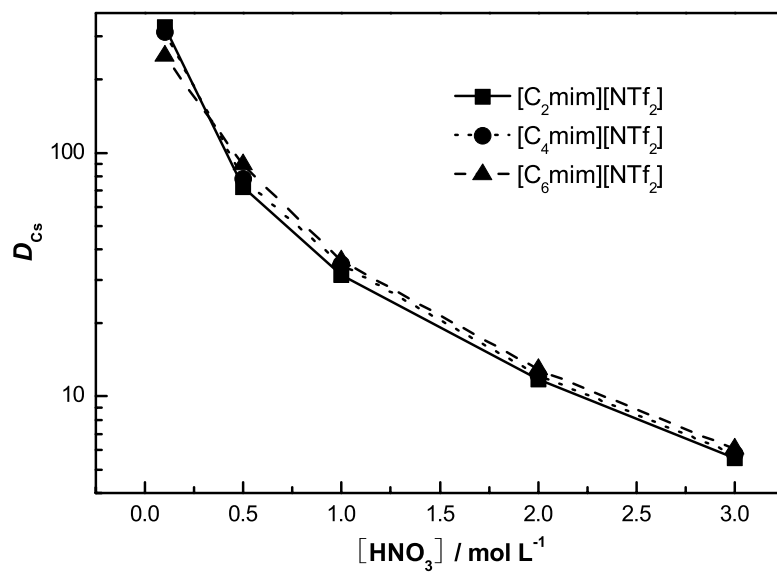

**Fig. S2** Dependence of  $D_{Cs}$  on the initial  $HNO_3$  concentration in aqueous phase of BPC6/ $[C_n\text{mim}][NTf_2]$  systems.  $[BPC6]_{\text{initial}} = 15 \text{ mmol L}^{-1}$ ,  $[Cs^+]_{\text{initial}} = 10 \text{ mmol L}^{-1}$ .

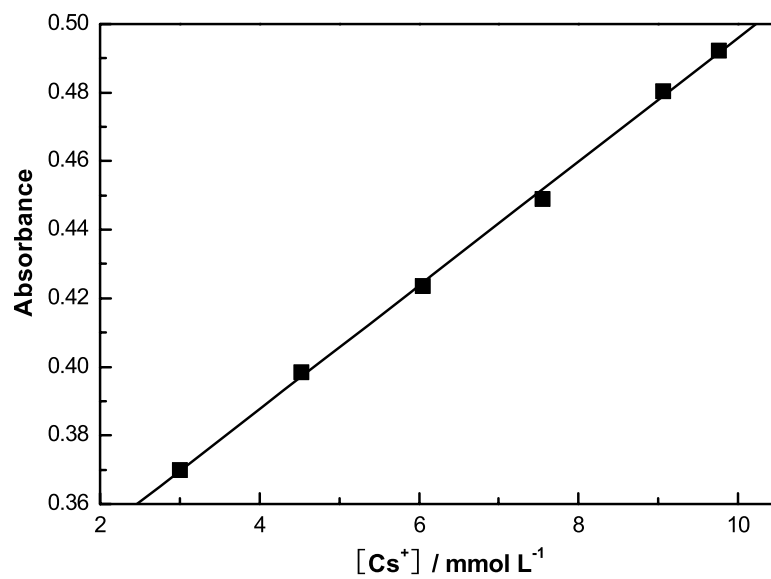

**Fig. S3** Dependence of the absorbance of  $[\text{C}_4\text{mim}]^+$  at 211 nm in the aqueous phase on the concentration of extracted  $\text{Cs}^+$ . Apparently illustrated by this figure, there is a linear correlation between the two variables. More  $\text{Cs}^+$  extracted, more  $[\text{C}_4\text{mim}]^+$  exchanged to the aqueous phase.

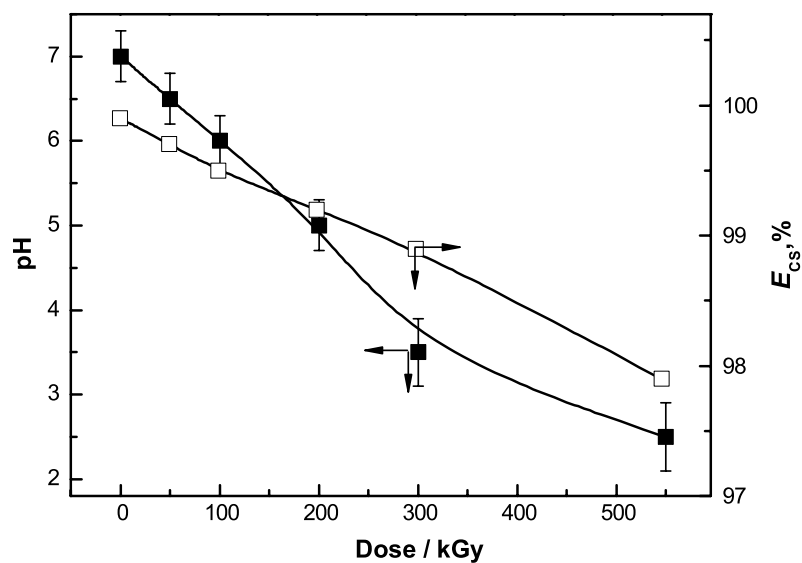

**Fig. S4** Dependence of pH in aqueous solutions and  $E_{Cs}$  on  $\gamma$ -dose when  $Cs^+$  extraction from the aqueous solutions using irradiated  $[C_4mim][NTf_2]$  in combination with BPC6. pH in aqueous solutions decreases with increasing absorbed dose of  $[C_4mim][NTf_2]$ , leading to the decrease of  $E_{Cs}$ .
